# Supplementary material
Source: PubMed Central journal article supplement (PMC5320957)

Compound 1 (TFS)

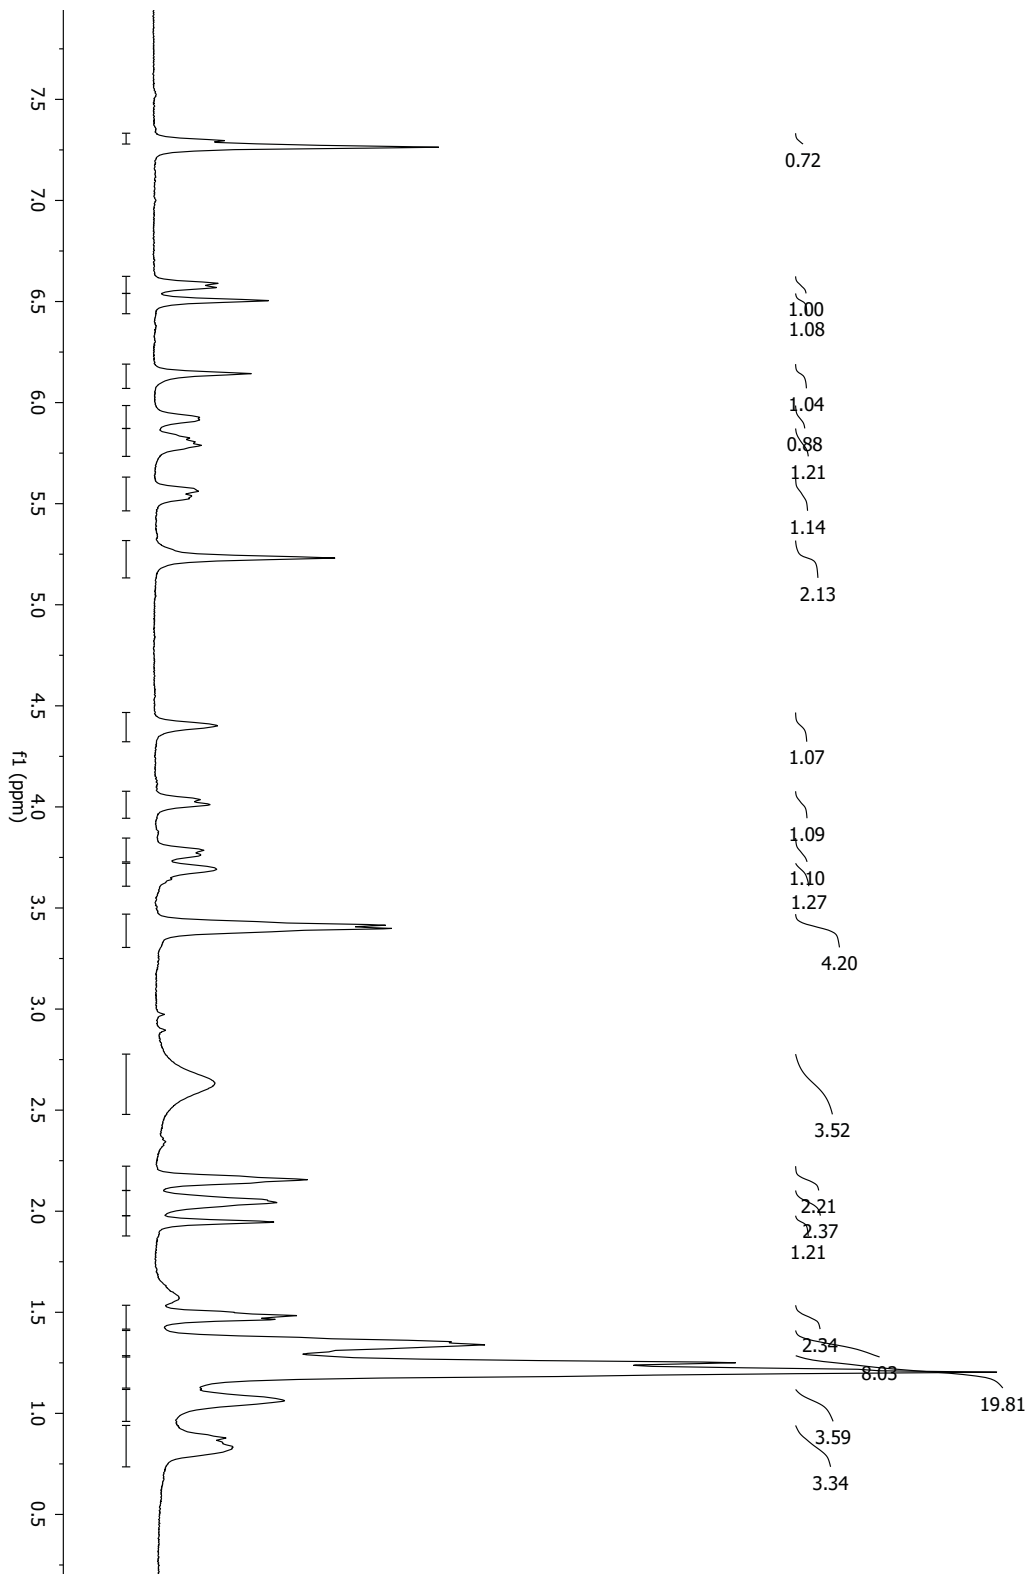

Compound 1 (TFS)

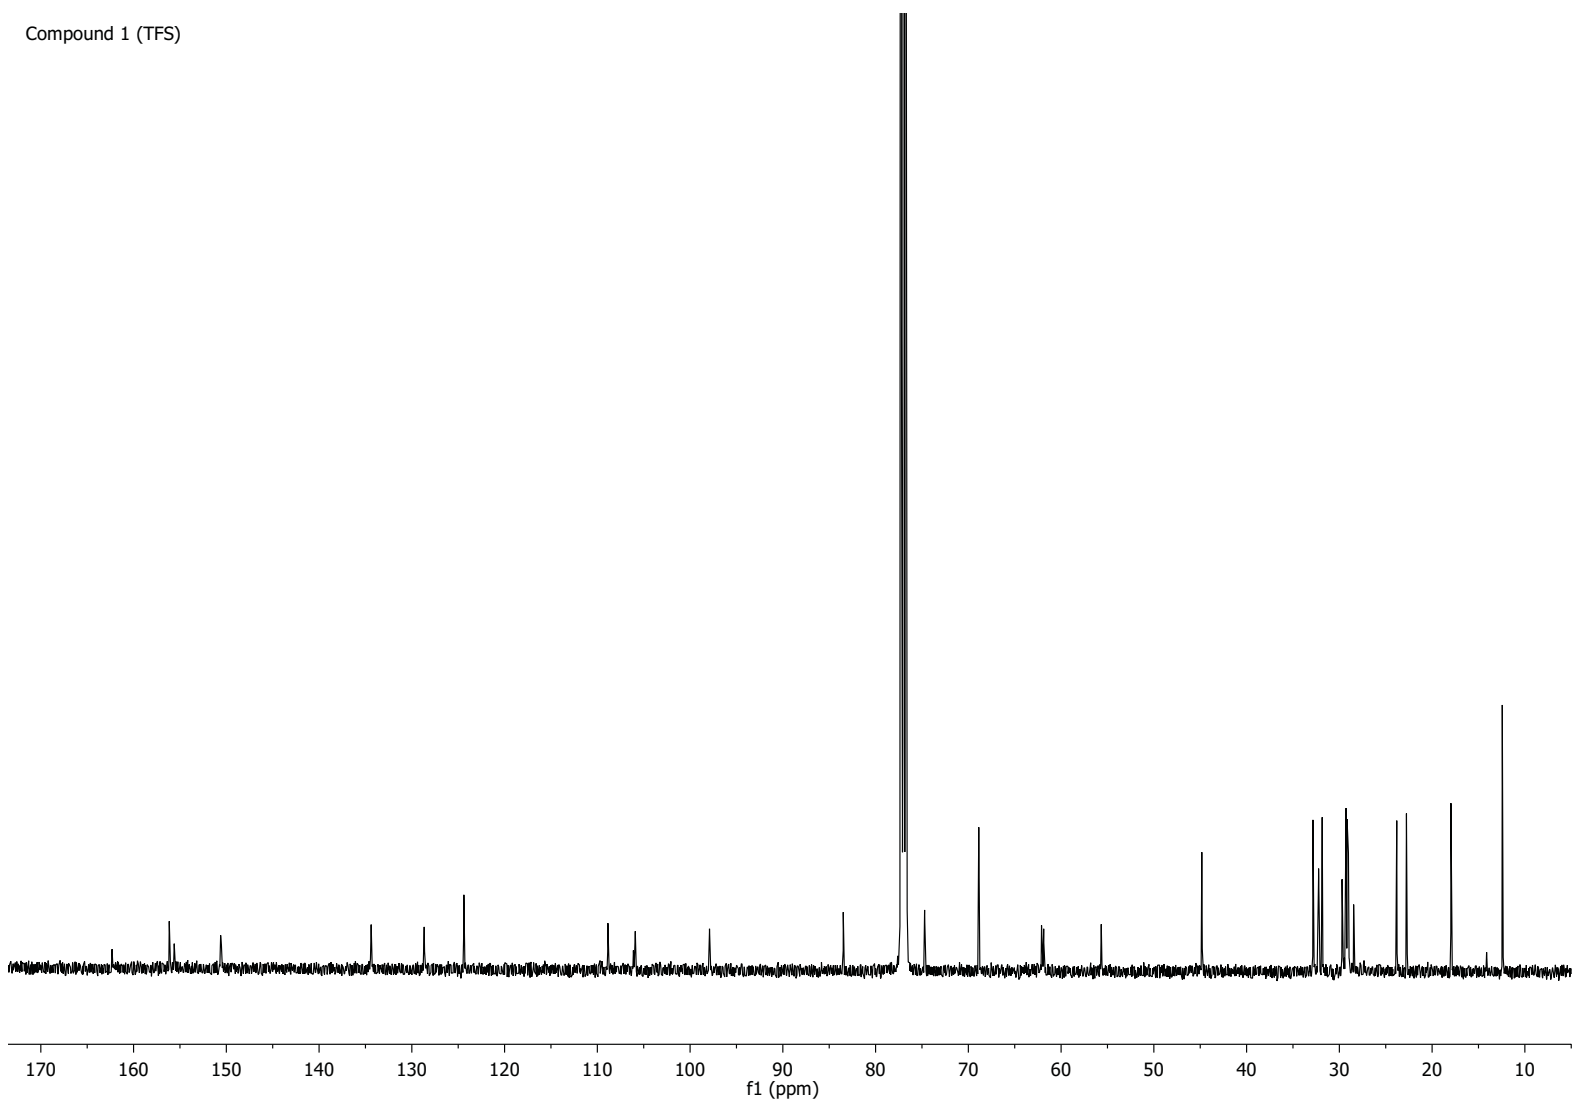

Compound 2 (TFDAG)

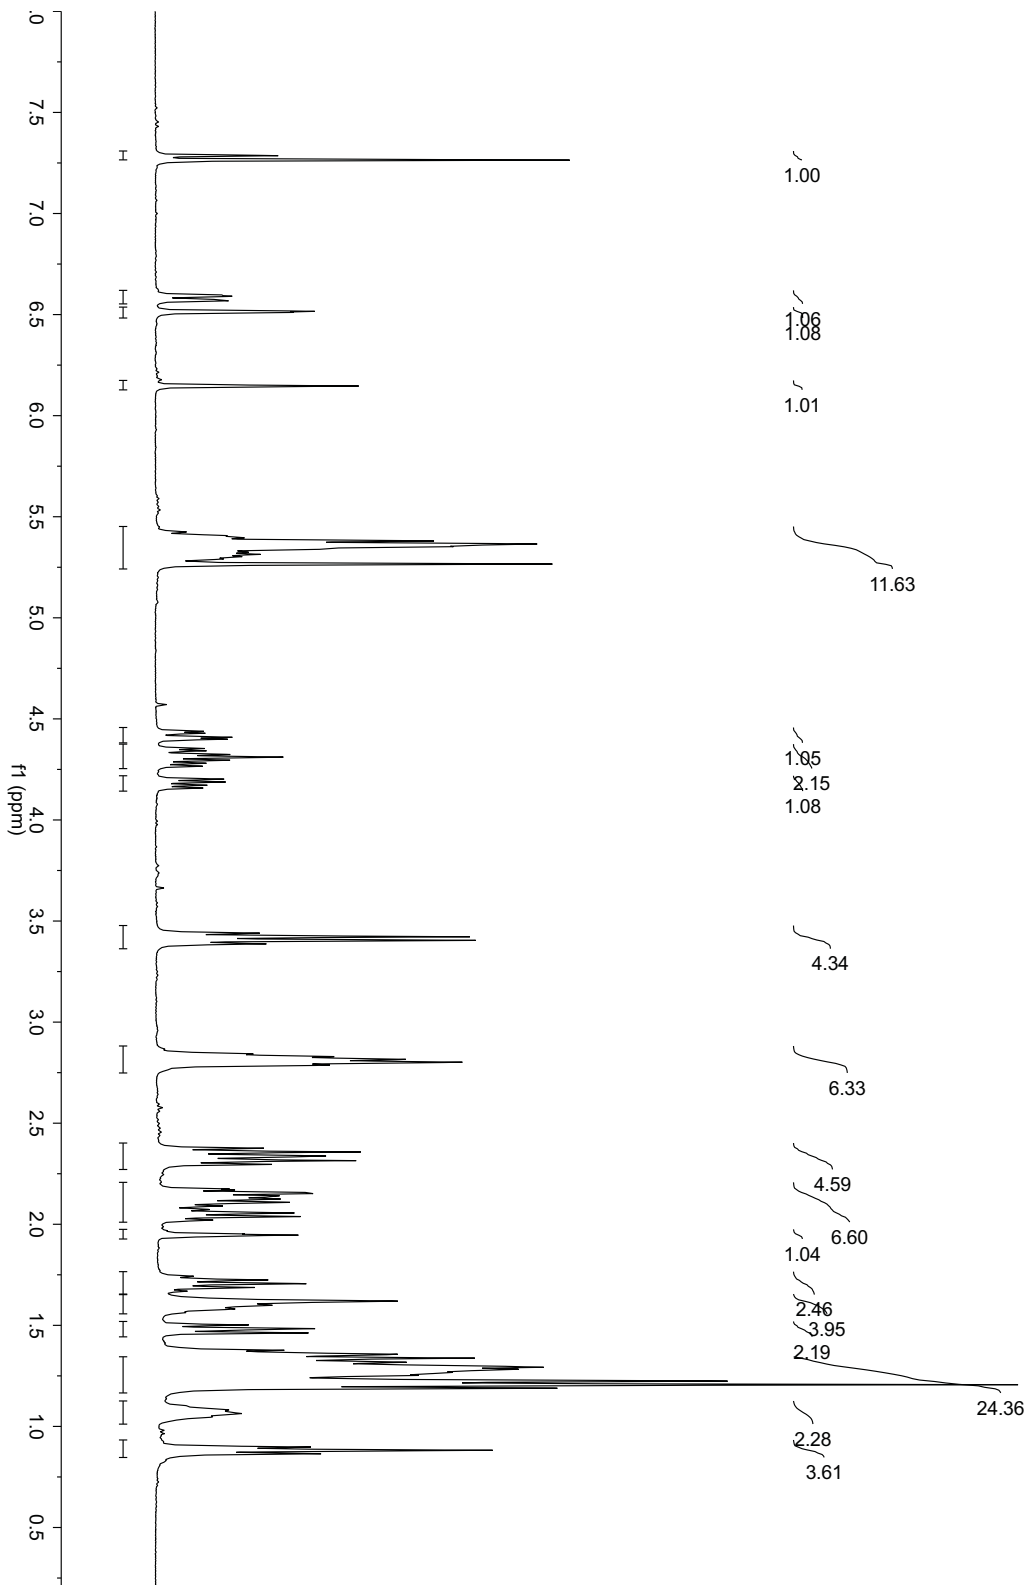

Compound 2 (TFDAG)

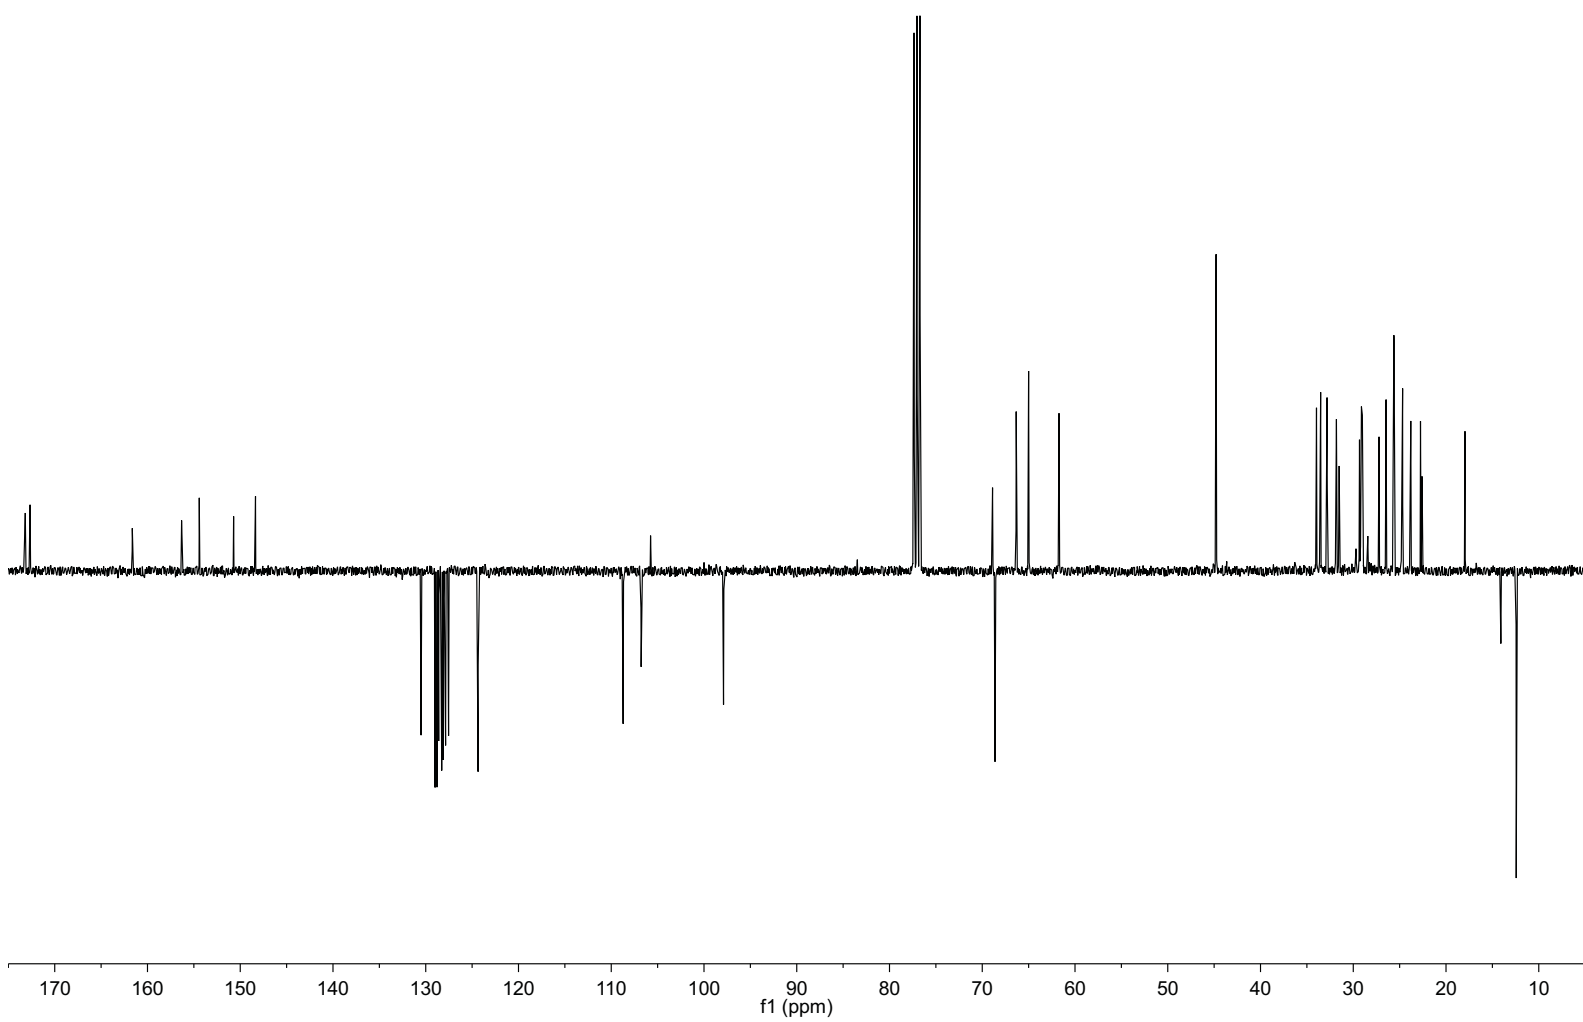

Compound 3 (TFFA)

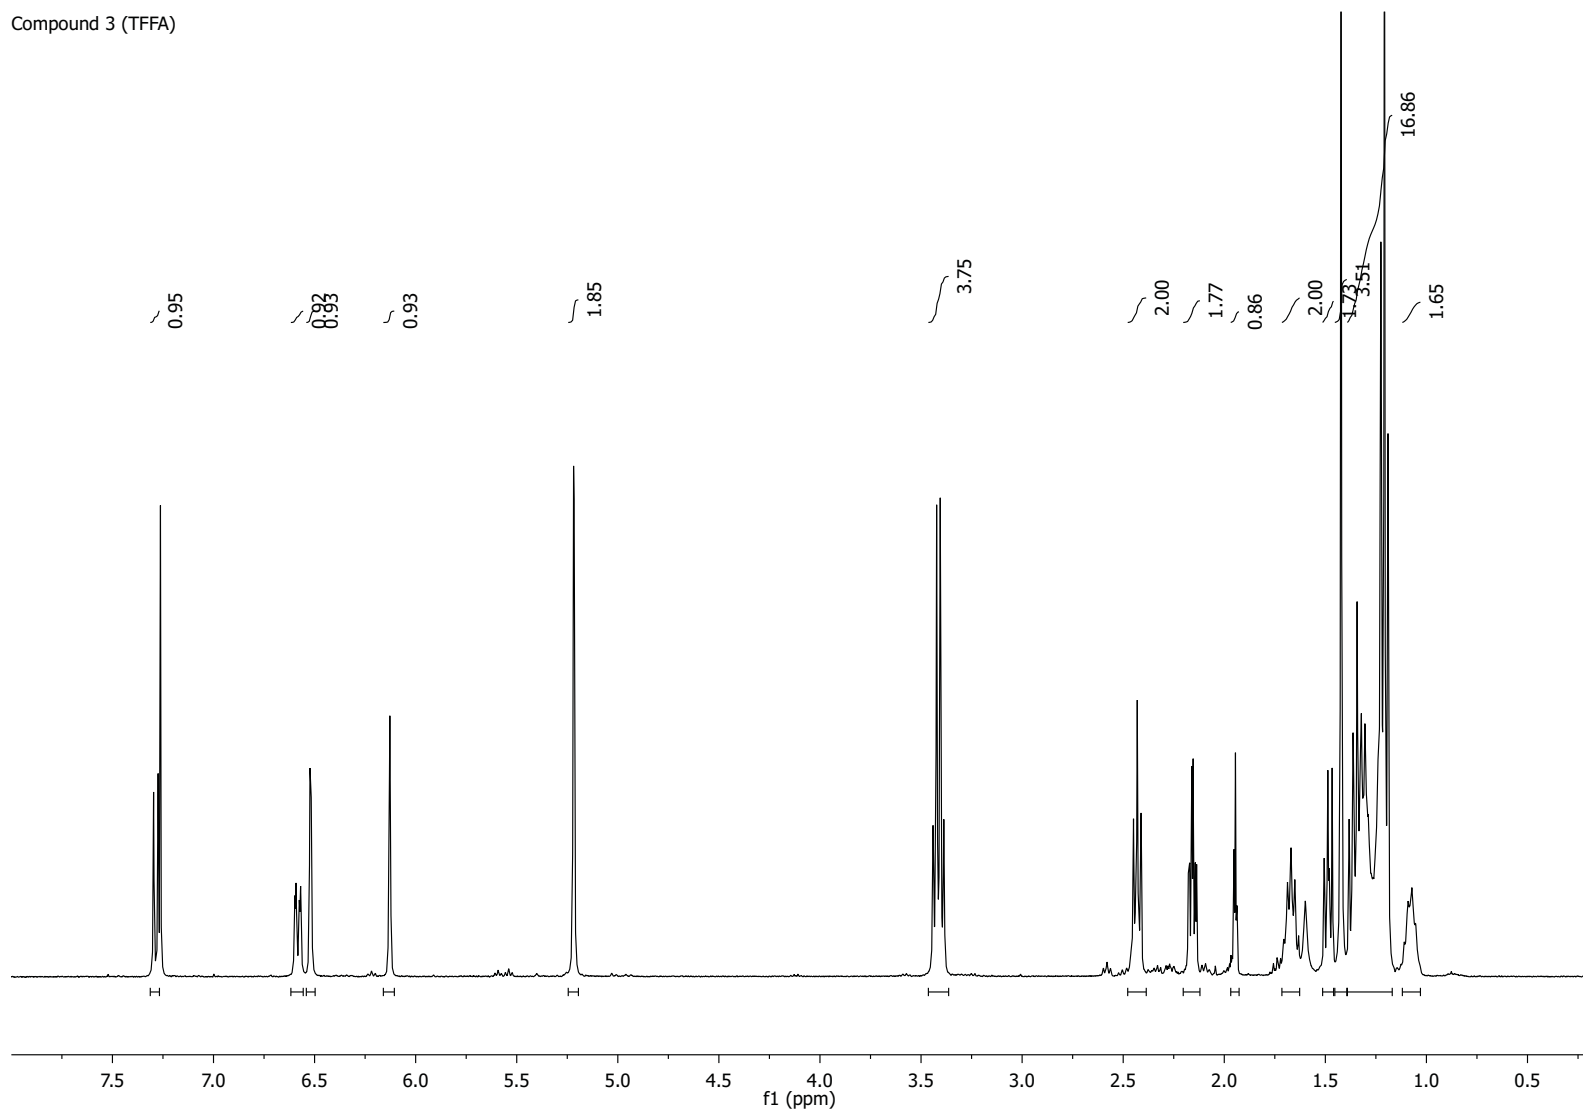

Compound S2

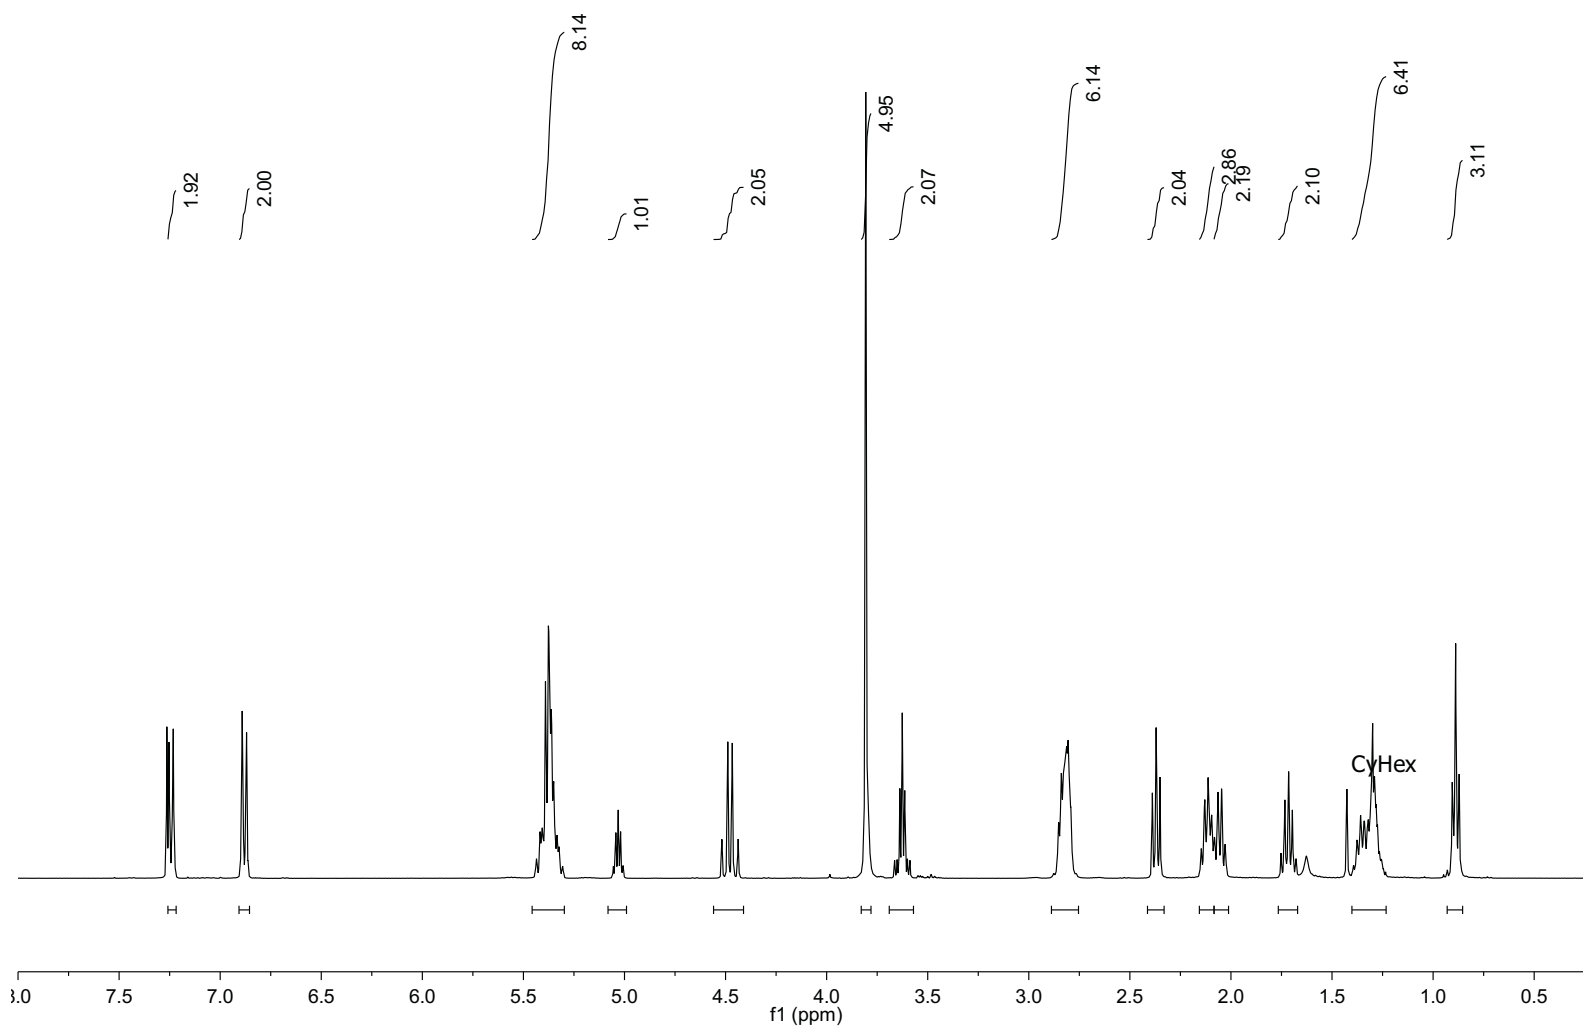

Compound S2

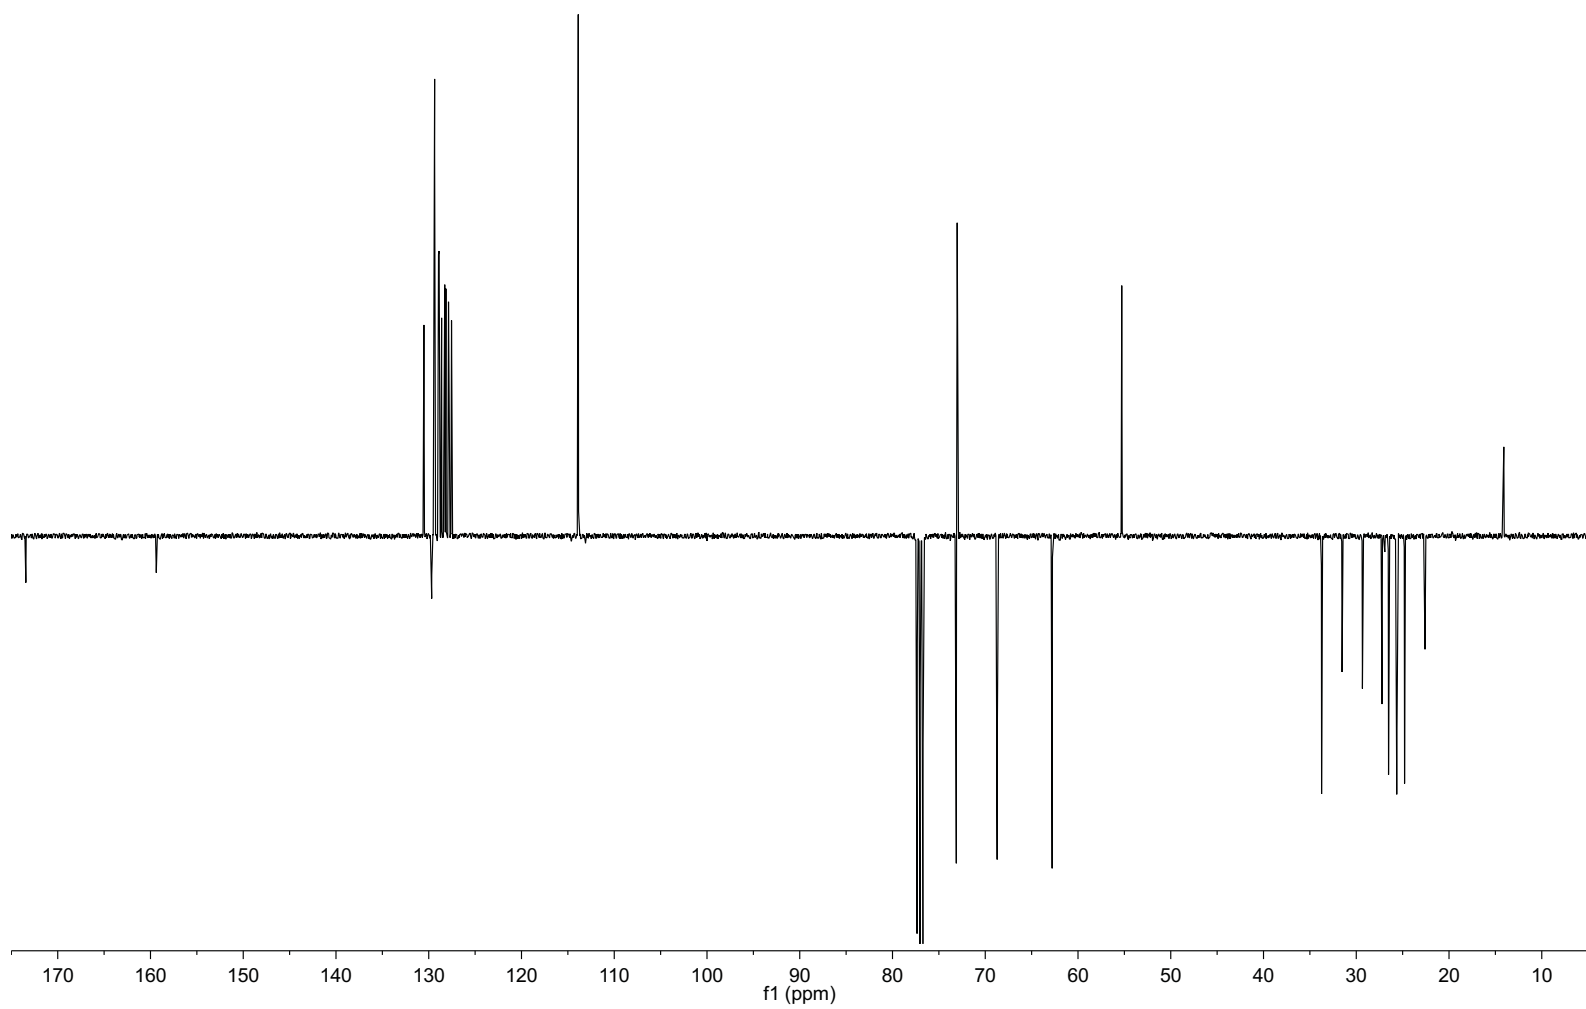

Compound 7

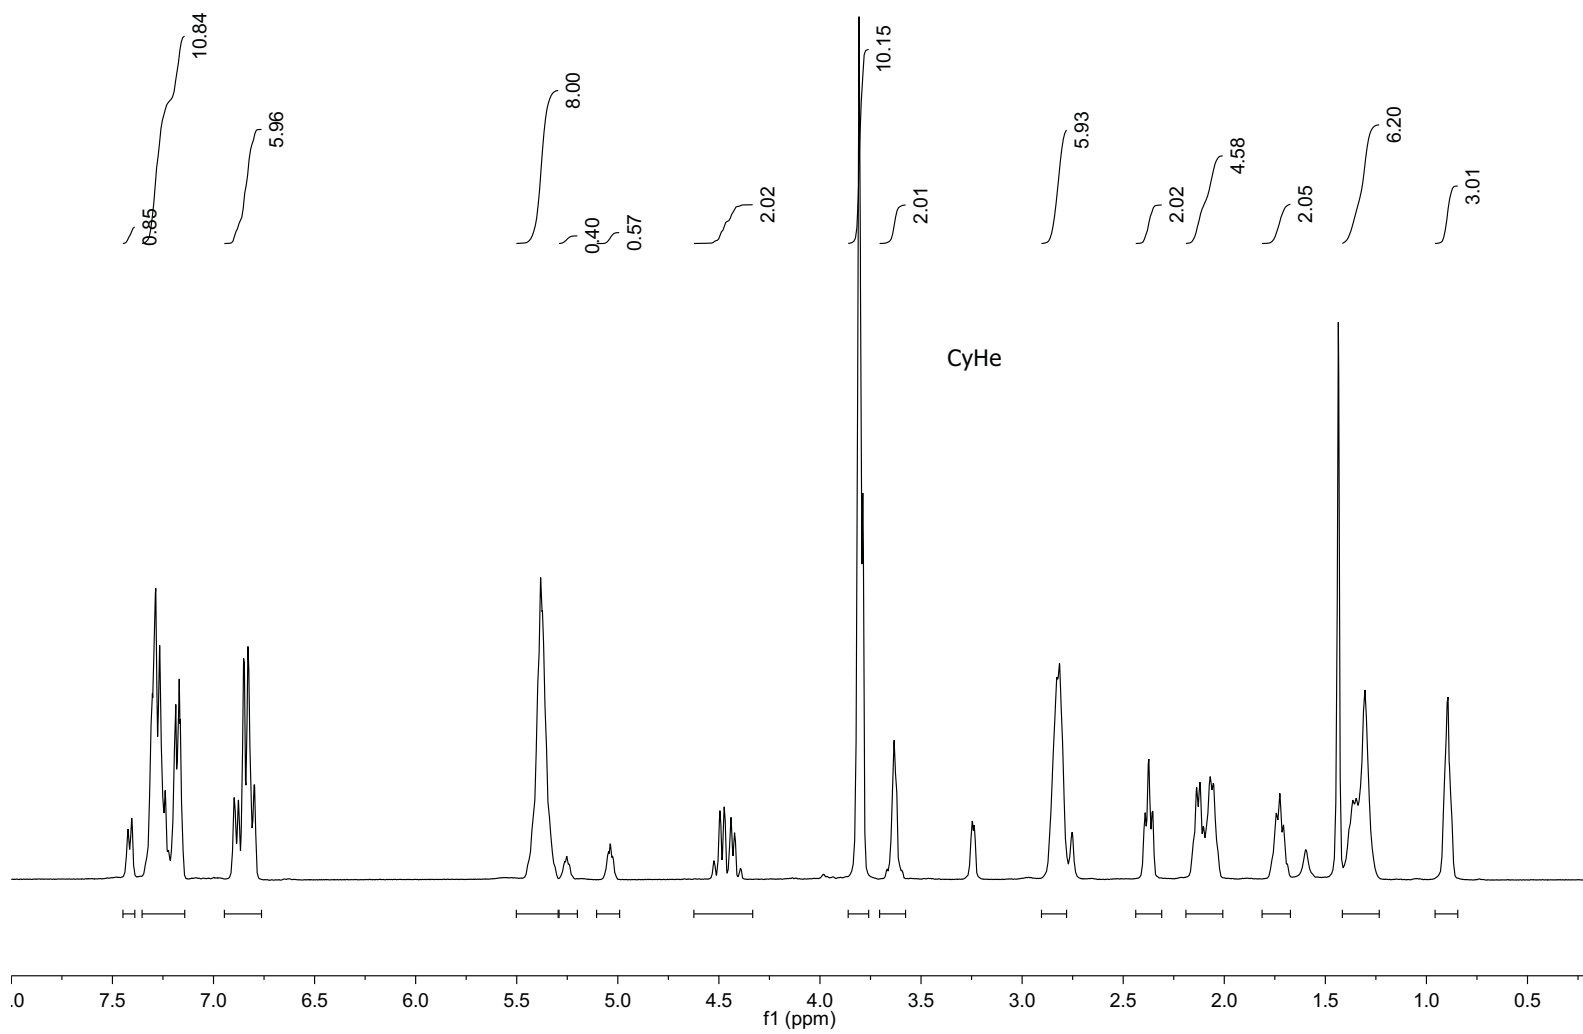



Compound 7

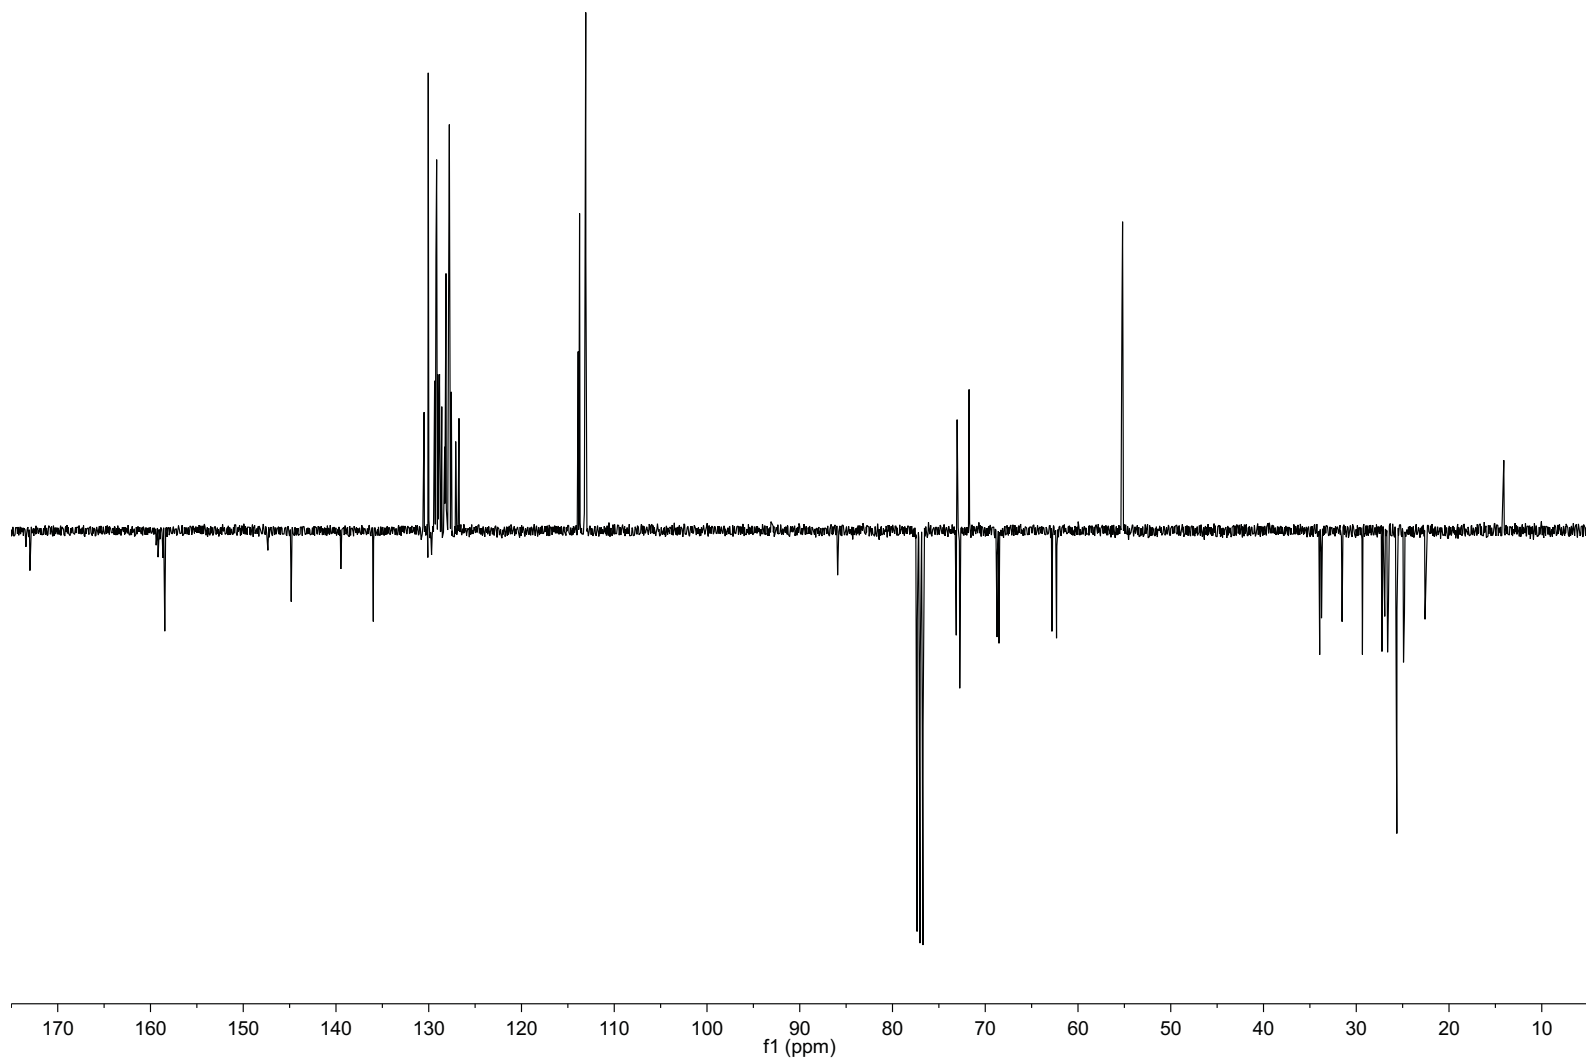

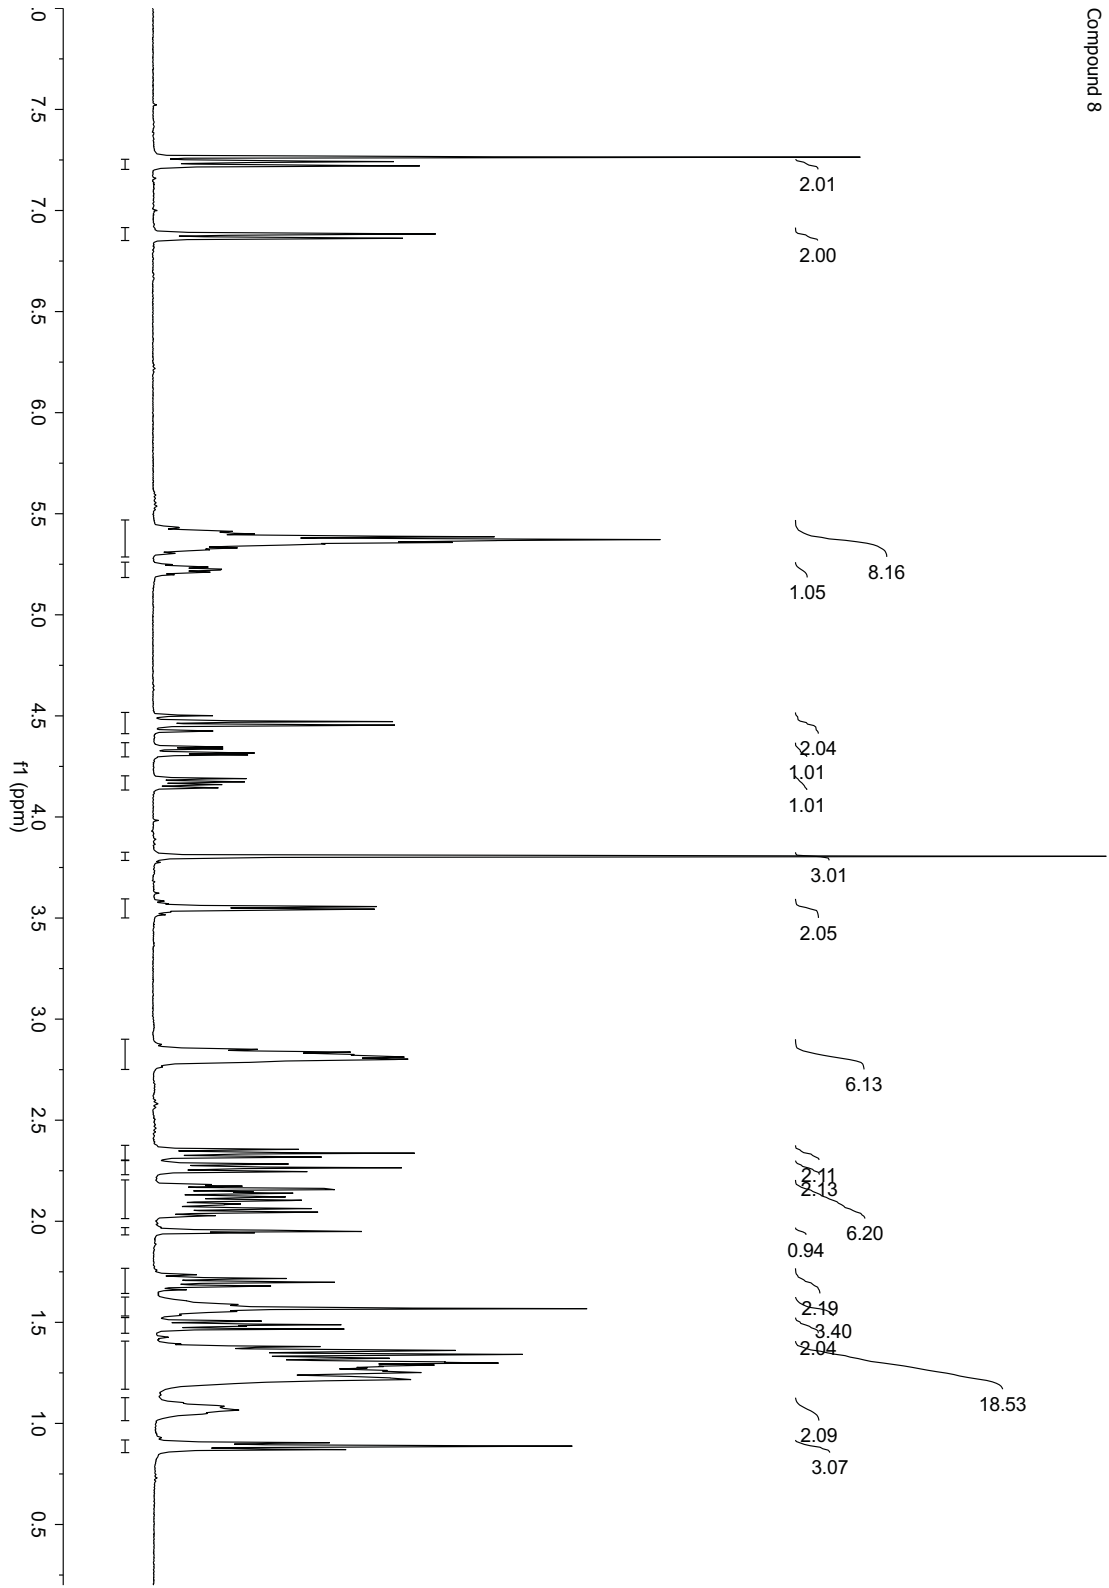

Compound 8

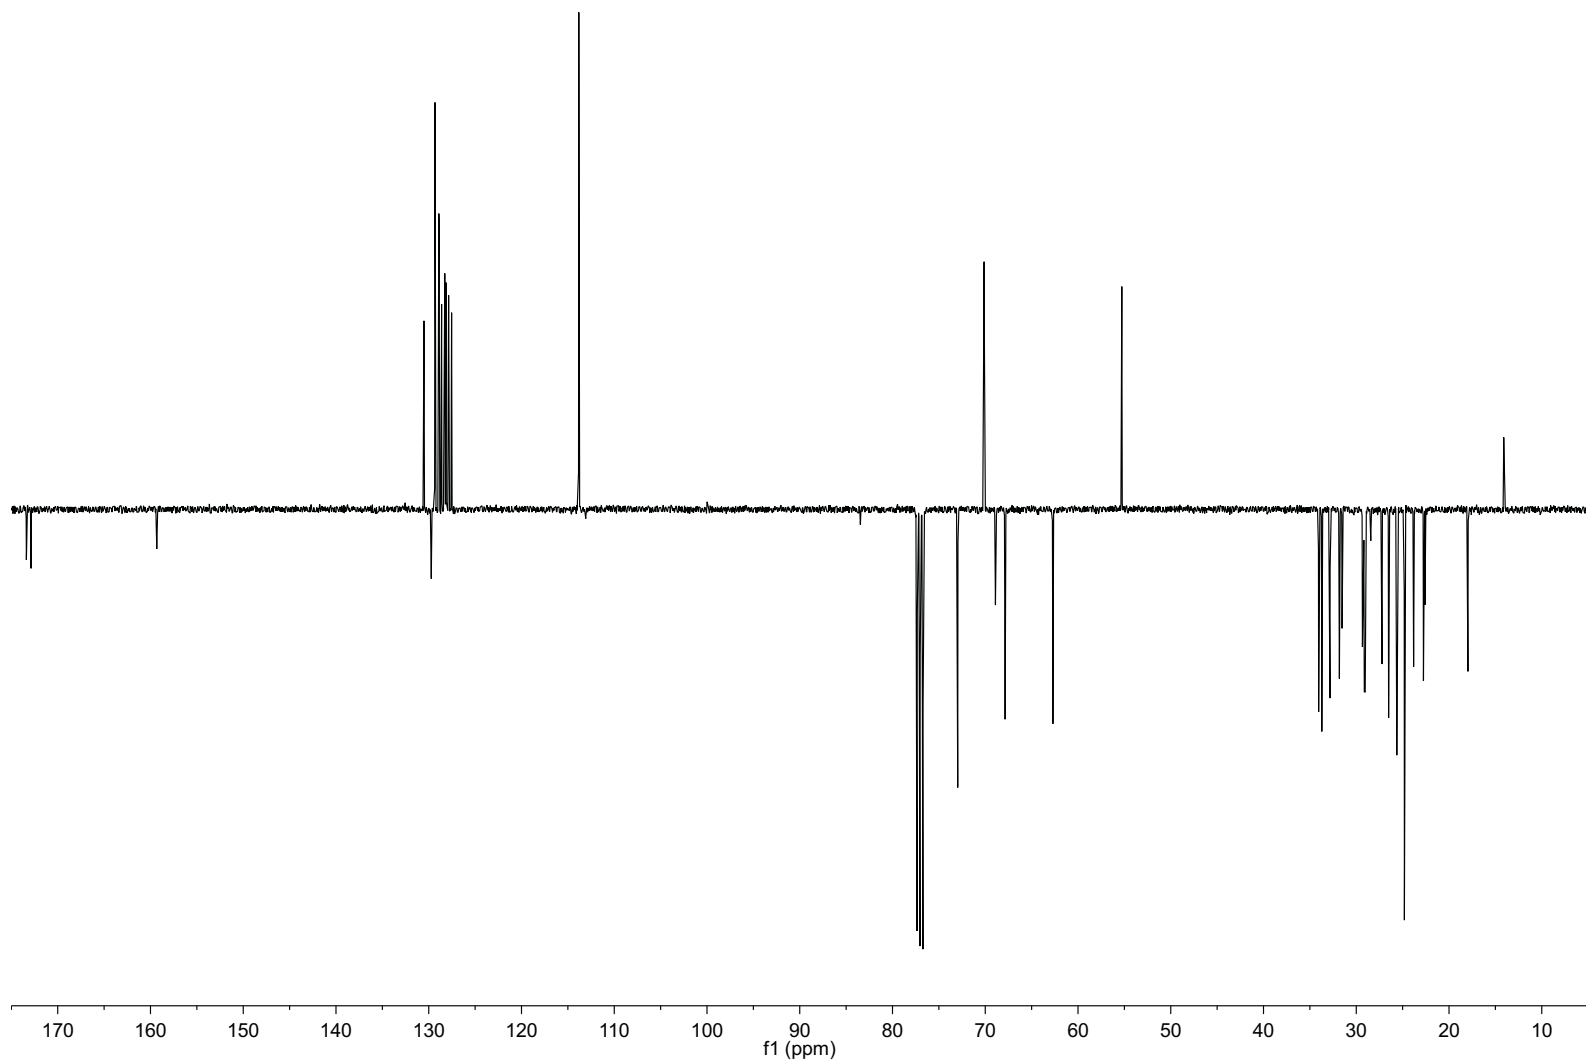

Compound 10

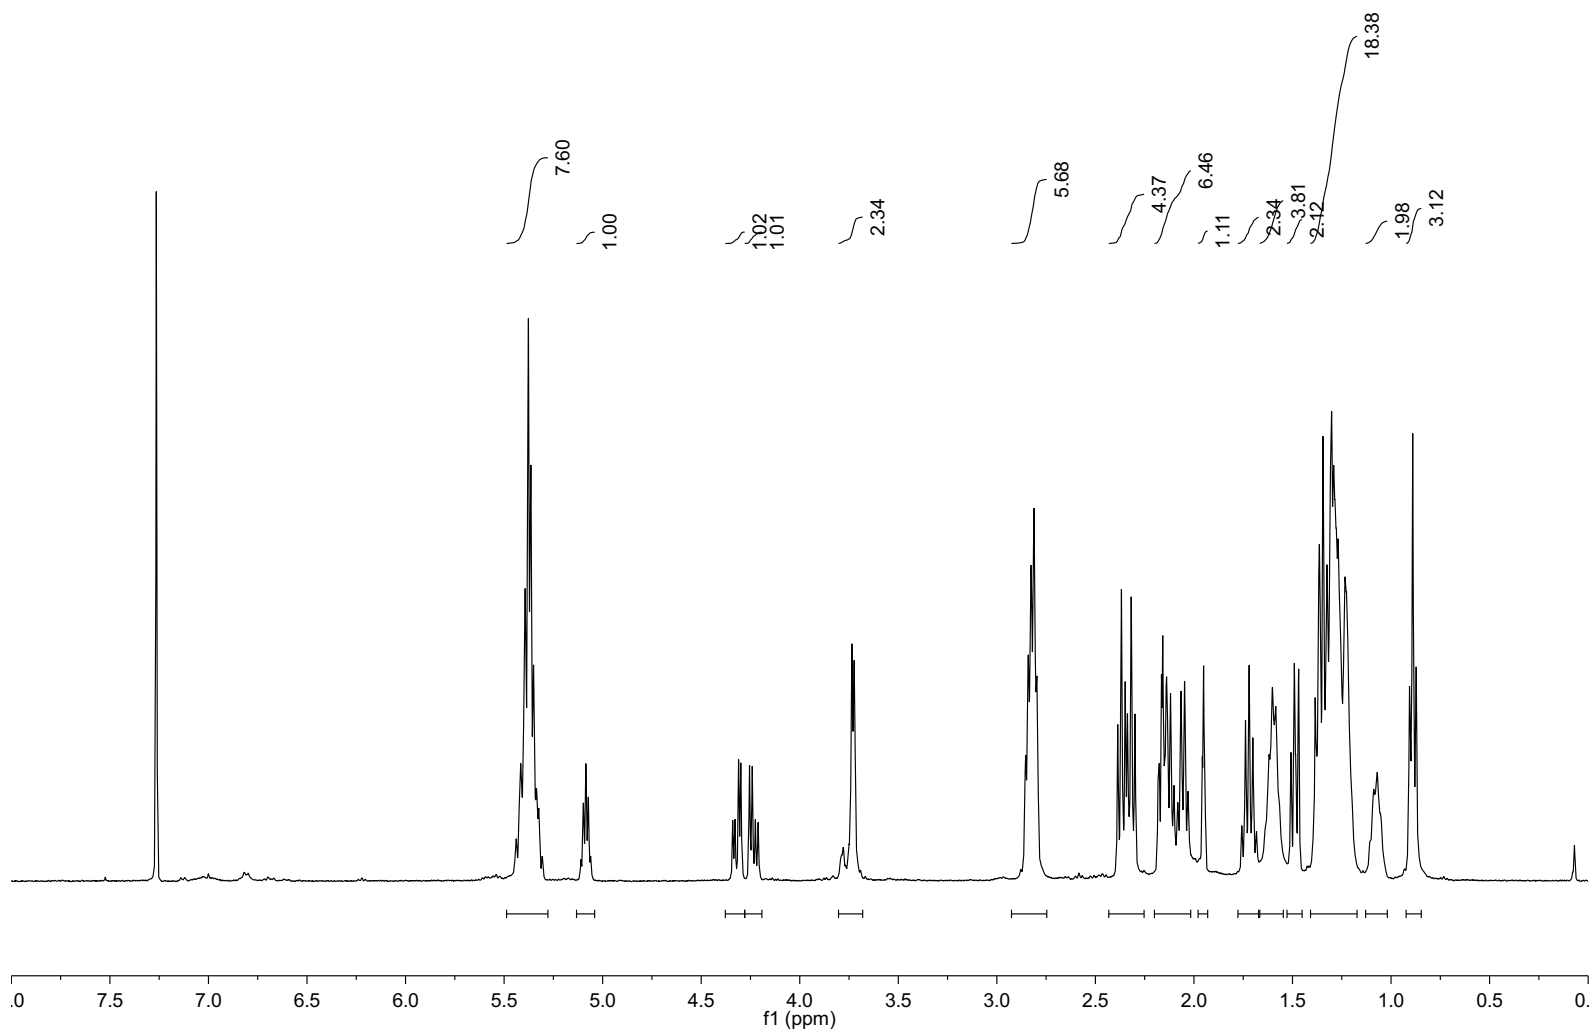

Compound 10

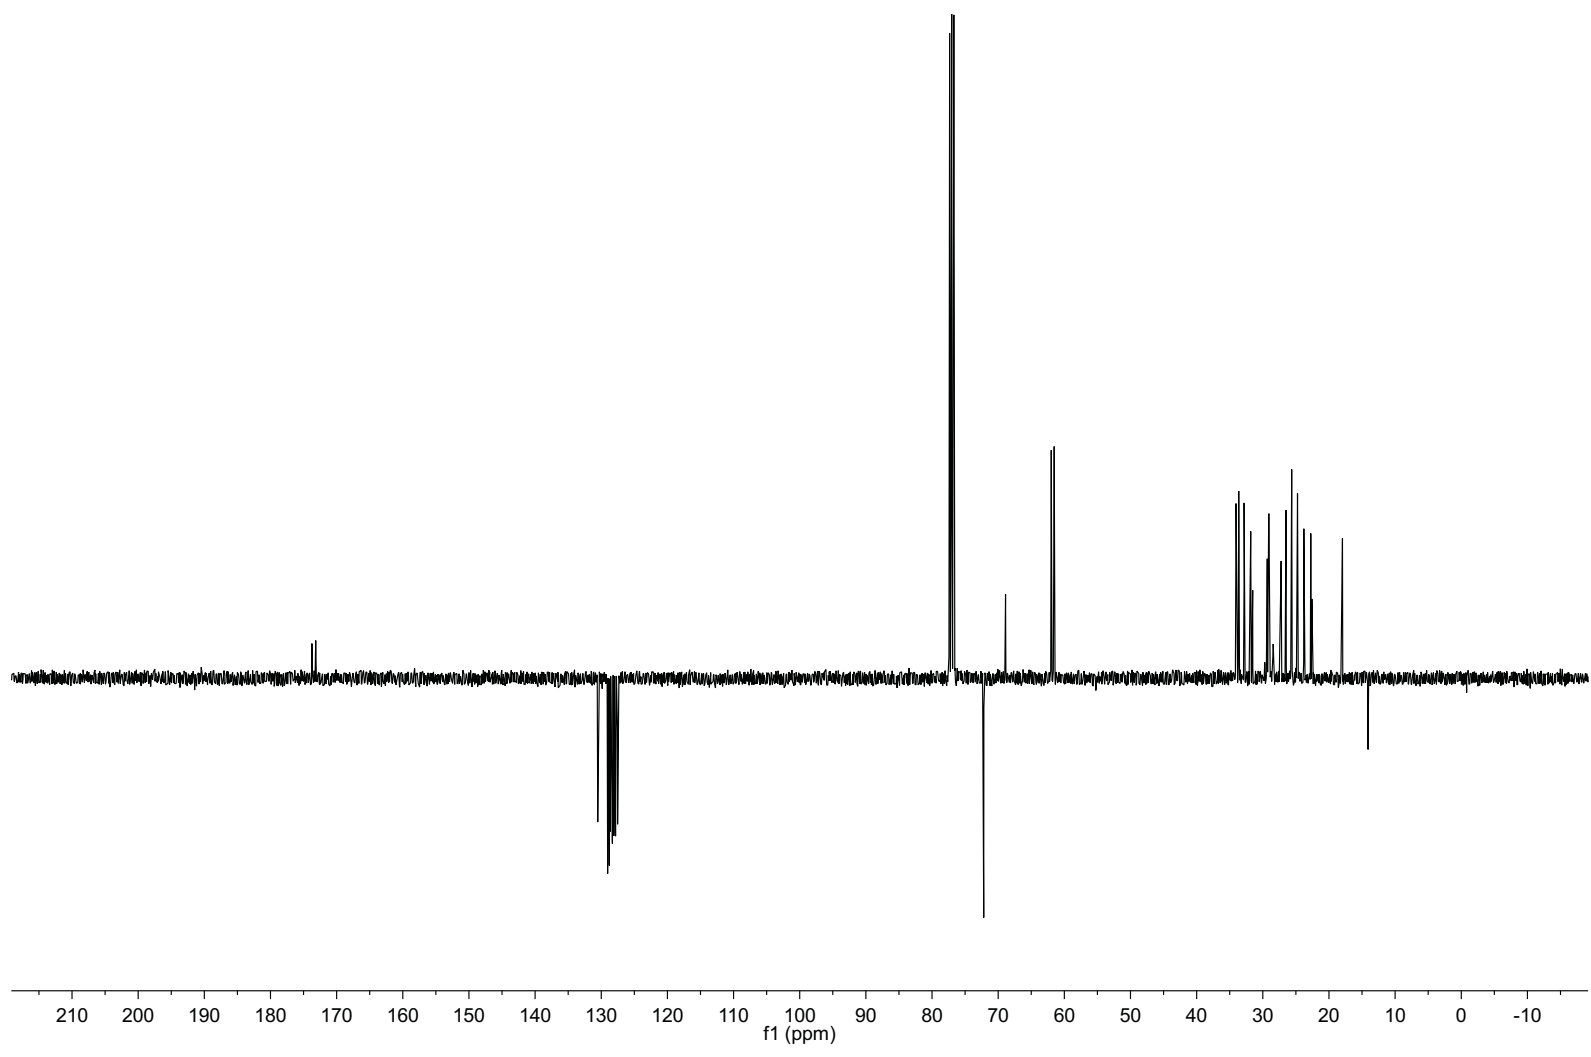

Supplement: pnas.1611096114.sd02.pdf [file pnas.1611096114.sd02.pdf]
